# Supplementary material for: Multiresolution correction of GC bias and application to identification of copy number alterations
Source: Oxford University Press journal article supplement (doi:10.1093/bioinformatics/btz174), 2019-03-12
Supplement: bioinformatics_35_20_3890_s10.pdf [file bioinformatics_35_20_3890_s10.pdf]

# Supplementary material for “Multiresolution correction of GC bias and application to identification of copy number alterations”

Ho Jang<sup>1</sup> and Hyunju Lee<sup>1,\*</sup>

<sup>1</sup>School of Electrical Engineering and Computer Science, Gwangju Institute of Science and Technology, Gwangju 500-712, South Korea

\*hyunjulee@gist.ac.kr

## ABSTRACT

This is a supplementary material for the “Multiresolution correction of GC bias and application to identification of copy number alterations.”

## Contents

|          |                                                                                                             |           |
|----------|-------------------------------------------------------------------------------------------------------------|-----------|
| <b>1</b> | <b>Methods</b>                                                                                              | <b>2</b>  |
| 1.1      | Modeling the relation between a scaling coefficient and its GC proportion                                   | 2         |
| 1.2      | Modeling the relation between a wavelet coefficient and its GC proportion                                   | 2         |
| 1.3      | An example of a relation between coefficients and their GC proportion                                       | 3         |
| 1.4      | Stopping criteria for determining the decomposition level                                                   | 4         |
| <b>2</b> | <b>Results</b>                                                                                              | <b>6</b>  |
| 2.1      | The effect of multiresolution decomposition in simulation data                                              | 6         |
| 2.2      | Identification of cancer genes in WGS datasets                                                              | 7         |
| 2.3      | Identification of <i>CN</i> variations in simulated WGS data                                                | 8         |
| 2.4      | The effect of multiresolution decomposition in real cancer data                                             | 9         |
| 2.5      | Standard deviations (SDs) of corrected <i>CN</i> signals from paired normal WGS data                        | 10        |
| 2.6      | A comparison of GC correction methods for the identification of cancer-related genes with focal aberrations | 11        |
| 2.7      | Correlation with TCGA level 3 segments                                                                      | 13        |
| 2.8      | Comparisons of <i>CN</i> segments after GC correction                                                       | 16        |
| 2.9      | Correlation with TCGA level3 segments (2)                                                                   | 20        |
|          | <b>References</b>                                                                                           | <b>25</b> |

# 1 Methods

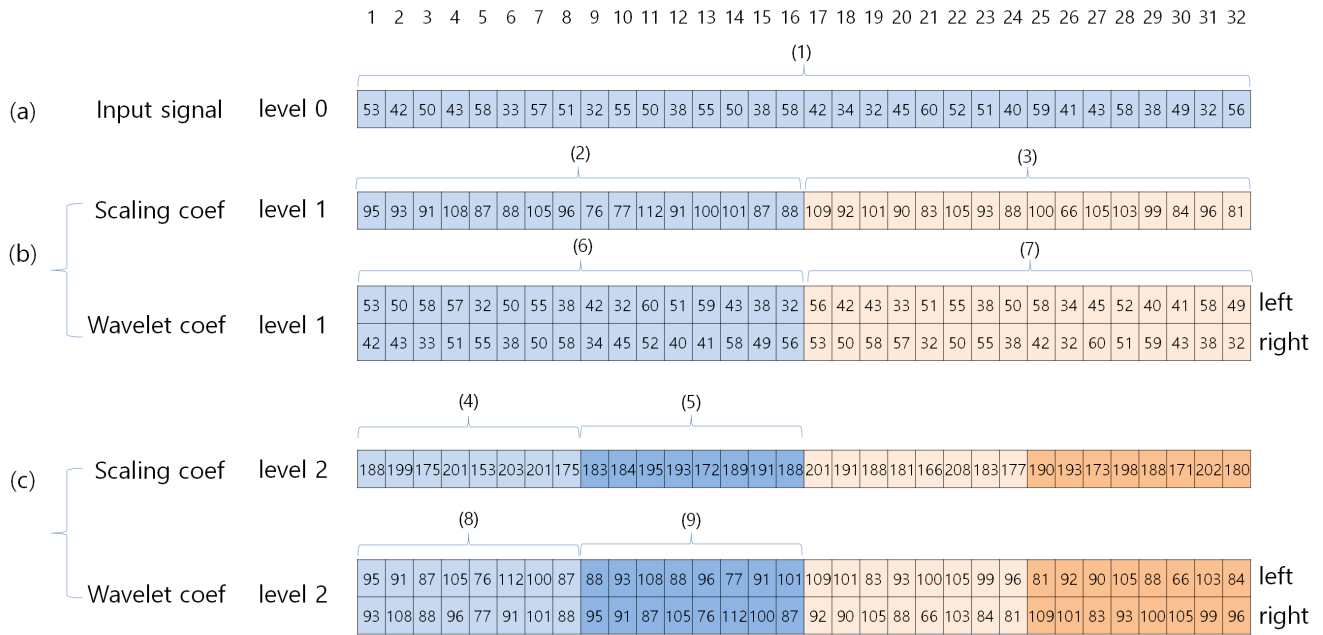

**Figure S1.** Wavelet and scaling coefficients and their original locations.

## 1.1 Modeling the relation between a scaling coefficient and its GC proportion

Figure S1 shows an example of GC proportion calculation. The GC proportion for level 1 scaling coefficients is calculated from the sum of the GC proportions of the two neighboring input bins [Figure S1 (1) to Figure S1 (2)]. In the case of the GC proportion from a shifted input signal, the GC proportion of the scaling coefficient is the sum of the two GC proportions of the shifted input signal [the shifted signal of Figure S1 (1) to Figure S1 (3)]. The GC proportion of level 2 scaling coefficients is the sum of the level 1 GC proportions previously calculated [Figure S1 (2) to Figure S1 (4)]. In the case of the level 2 GC proportion of the scaling coefficients from the shifted level 1 scaling coefficients, the GC proportion of the scaling coefficient is the sum of the two GC proportions of shifted level 1 scaling coefficients [the shifted signal of Figure S1 (2) to Figure S1 (5)].

## 1.2 Modeling the relation between a wavelet coefficient and its GC proportion

Figure S1 presents an example of GC proportion calculation. The GC proportions for level 1 wavelet coefficients are extracted from the GC proportions of the two neighboring input bins [Figure S1 (1) to Figure S1 (6)]. In the case of the GC proportions from the shifted input signal, the GC proportions of the wavelet coefficient are extracted from the two GC proportions of the shifted input signal [the shifted signal of Figure S1 (1) to Figure S1 (7)]. The GC proportions of level 2 wavelet coefficients come from the GC proportions of the level 1 scaling coefficients [Figure S1 (2) to Figure S1 (8)]. In the case of the level 2 GC proportions of the wavelet coefficients from the shifted level 1 scaling coefficients, the GC proportions come from the two GC proportions of shifted level 1 scaling coefficients [the shifted signal of Figure S1 (2) to Figure S1 (9)].

### 1.3 An example of a relation between coefficients and their GC proportion

In Figure 3 of the main text, we gave an example of a fitted scaling coefficient and wavelet coefficient from simulated GC-biased sequencing reads. The scaling coefficient in the figure is left skewed. We give another example to help understand the relation between the coefficients and GC proportion. Figure S2 depicts the relation between fitted coefficients and the GC proportion from symmetrically biased simulated sequencing data. We used Pysim-sv to generate simulated reads and simulate GC bias, on the basis of the pattern from our custom formula  $y = -20 \times (x - 0.5)^2 + 1$ , where  $x$  represents the GC proportion of the sequencing reads, and  $y$  denotes a sampling rate. Figure S2 (a) shows the distribution of raw scaling coefficient values and their GC proportions at decomposition level 1. The red curve is the LOESS-fitted scaling coefficients. The curve has a symmetrical shape centering around the GC proportion of 0.5. Figure S2 (b) illustrates the smoothed results representing the relation between GC proportions of consecutive genomic regions and wavelet coefficients at decomposition level 1. The  $x$ -axis represents the left-hand genomic region,  $y$ -axis denotes the right-hand genomic region, and the color represents the values of wavelet coefficients. In this figure, when the GC proportion of the left-hand region is  $\sim 0.5$  and the GC proportion of the right-hand region is far from 0.5, the value of the wavelet coefficient between the two neighboring regions is negative (blue pixel) and DOC decreases.

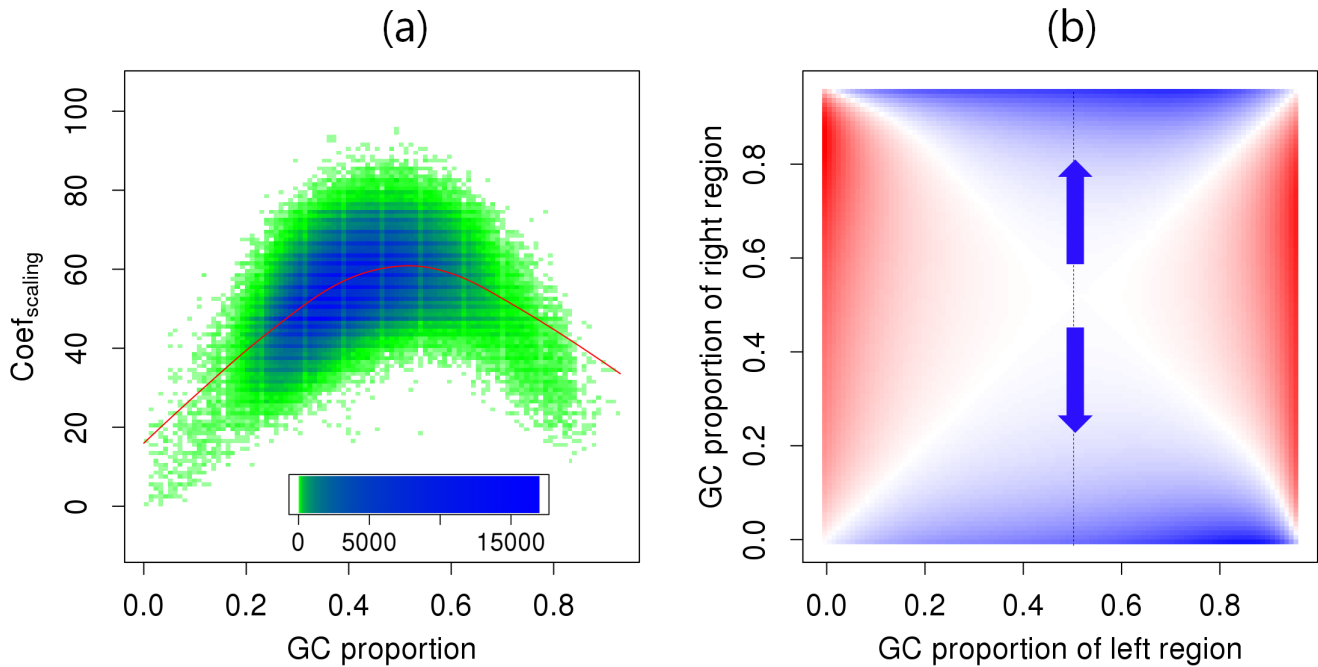

**Figure S2.** The relation between coefficients and their GC proportions of the simulated GC-biased sequencing reads. (a) The relation between the GC proportion and scaling coefficient. The heatmap illustrates the distribution of raw scaling coefficient values. The  $x$ -axis means the GC proportion of the coefficients, and the  $y$ -axis denotes the values of the scaling coefficients. Most of scaling coefficients are concentrated in blue areas. The scaling coefficients are rarely distributed to the green areas. The red curve is the LOESS-fitted scaling coefficient depending on the specific GC proportion. (b) The relation between two neighboring GC proportions and the wavelet coefficient. The heatmap depicts the relation between the values of wavelet coefficients (pixel color) and the GC proportion of two neighboring genomic regions ( $x$ -axis and  $y$ -axis) from 2D kernel smoothing. Red areas represent increasing DOC values of the right-hand genomic region compared to the left-hand region in the two adjacent genomic regions. The blue areas indicate the opposite case.

### 1.4 Stopping criteria for determining the decomposition level

In Figure 9 of the main text, we demonstrated that we can make GC fluctuation patterns in  $DOC_{GC}$  similar to the pattern in  $DOC_{raw}$  as we increase the decomposition level. If we correct GC bias by dividing  $DOC_{raw}$  by  $DOC_{GC}$ , we can see a reduction of GC bias in the  $CN_{Wabico}$  signal in Figure 8 of the main text. GC curves in Figure 8 also represent severity of GC bias in the signal. If the shape of the GC curve of the DOC signal is closer to the horizontal line, it may indicate that the effect of GC bias is smaller. In short, the increase in the decomposition level may reduce GC bias.

Nonetheless, throughout the analyses, we found that in some cases, a high decomposition level does not always yield good results on GC bias correction. In other cases, even if performance is slightly improved, the improvement is insignificant in relation to the computation required. Thus, the proper decomposition level has to be determined manually by the user or by the specific criteria.

Consequently, in Wabico, we use the GC curve to determine the proper decomposition level. Here, we tried to measure how close the shape of the curve is to the horizontal line. For this task, we designed a criterion based on the amount of changes between GC curves of the current level decomposition and the decomposition of the next level. In Supplementary Figure S3 (a), GC curves of  $CN_{Wabico}$  from the decomposition levels 1 and 2 are shown. The curve was changed from level 1 to level 2. Some part of the curve moved up and the other part of the curve moved down, and thus the shape of the curve became closer to the horizontal line. In Supplementary Figure S3 (b), the GC curve from decomposition level 3 is presented, and the shapes of the curves of levels 2 and 3 are compared. The shape of the curve became closer to the horizontal line than before. On the other hand, for some parts of the curve, their direction of change is inconsistent with the initial direction of change in Figure S3 (a) (marked by X below the curve). For example, in Supplementary Figure S3 (a), the third arrow moved down, whereas in Figure S3 (b), the third arrow moved up. Thus, we set the ratio of inconsistency in the change of GC curves as the threshold for stopping the decomposition. We also set a specific maximum decomposition level for stopping decomposition. In our analyses, if the decomposition level exceeded 10, the GC correction effect seemed to be insignificant in many samples. In conclusion, we stop signal decomposition according to the inconsistency ratio and a specific maximum decomposition level.

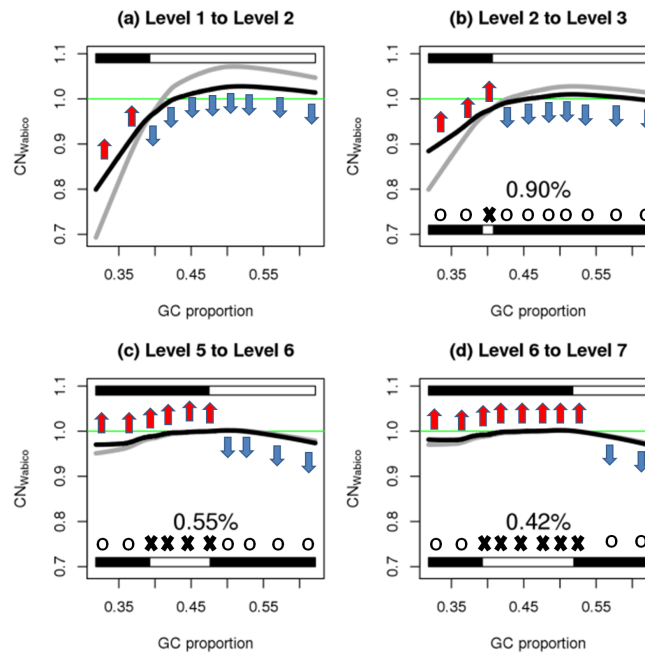

**Figure S3.** An example of multiresolution GC bias correction. (a)  $CN_{Wabico}$  values from level 1 (gray) to level 2 (black). (b)  $CN_{Wabico}$  values from level 2 (gray) to level 3 (black). (c)  $CN_{Wabico}$  values from level 5 (gray) to level 6 (black). (d)  $CN_{Wabico}$  values from level 6 (gray) to level 7 (black).

In Figure S3, we explained effects of decomposition level changes using GC curves. Figure S3 further explains effects of decomposition levels, and inconsistency between the initial direction of change and the direction of change of CN values across genomic markers. Figure S4 (a) shows raw CN signals only with GC biases, but without CN alteration events across the genome. We assume that the CN signals of left and right genomic parts in the figure should decrease while the CN signals of the middle part in the figure should increase. Figure S4 (b) shows the decrease of the fluctuation in CN signal as Wabico is applied up to the decomposition level N. Figure S4 (c) shows the results of corrected CN signals as it is applied up to the level N+1. Although CN signal values of some genomic markers consistently change with the previous direction of change (blue arrows), there exist genomic markers whose direction of change of the CN value is inconsistent with the previous direction of change of the CN values (red arrows). As shown in Figure S4 (c), because the increase of inconsistencies does not always guarantee the proper GC bias correction, the level of inconsistency was used as an option for choosing proper decomposition level.

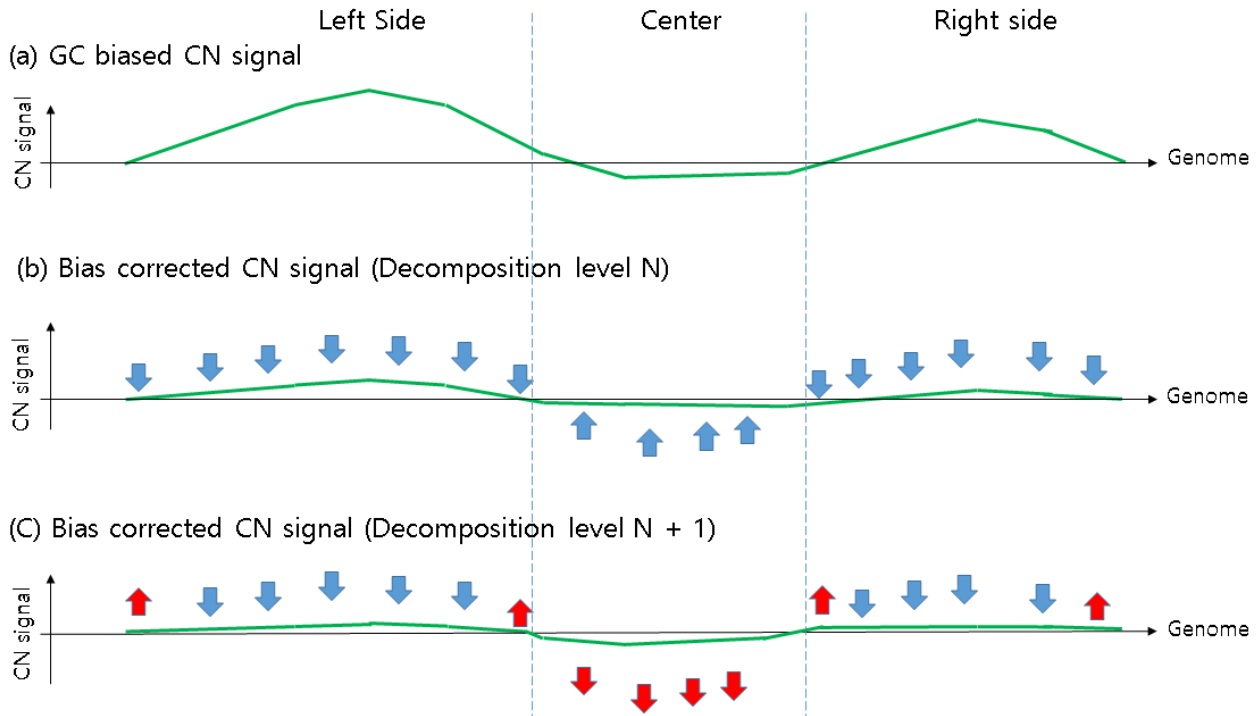

**Figure S4.** CN value changes across genomic markers.

## 2 Results

### 2.1 The effect of multiresolution decomposition in simulation data

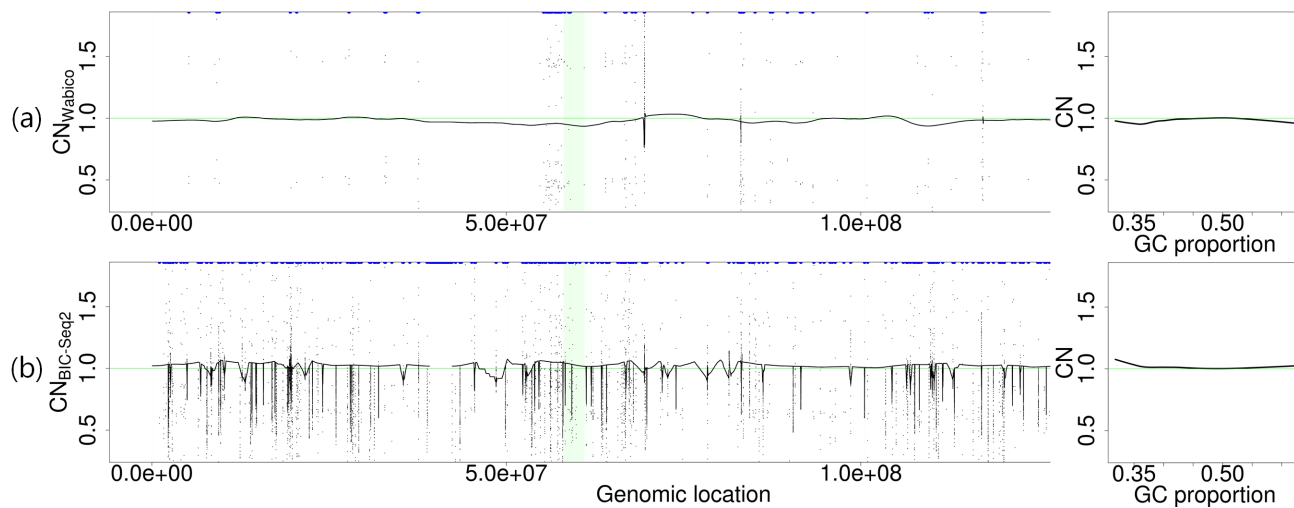

**Figure S5.** Copy number (CN) ratio signals of simulated reads as corrected by Wabico and BIC-Seq2-based expected read counts.

## 2.2 Identification of cancer genes in WGS datasets

Given denoised  $CN_{Wabico}$  signals, we assume that a cancer gene is altered if the following two conditions are satisfied.

1. The length of  $CN$  alteration including the cancer gene is less than 25% of the chromosome arm.
2. The difference between the  $CN$  ratio of the gene and its neighboring  $CN$  ratios was greater than 0.1. When the difference was less than 0.1 owing to other biases such as contamination with normal cells, we decided whether the cancer gene is altered based on  $y_{HIGH}^*$  values used in our previous study.<sup>1</sup> Positive  $y_{HIGH}^*$  values around the cancer gene indicate that the cancer gene is focally amplified, and negative  $y_{HIGH}^*$  values mean that the gene is focally deleted. To generate  $y_{HIGH}^*$ , we employed the same parameters as in our previous study.<sup>1</sup>

### 2.3 Identification of CN variations in simulated WGS data

In Figure 7 of the main text, we mainly demonstrated that Wabico shows stabler GC bias correction performance as compared to other methods on a set of simulated sequences at various levels of GC bias. In this section, we generated another set of simulated sequences with various levels of GC bias and 10 CN variations that were evenly spaced (Figure S6 (a)). We compared the CN ratios of the signals denoised by  $CN_{Wabico}$  and  $CN_{BIC-Seq2}$ . We determined whether the identified genomic regions from simulated data are true positive (TP), false positive (FP), true negative (TN), and false negative (FN) by means of thresholds. If the value of CN yielded by each method was greater or less than a threshold for amplification or deletion for the region of alteration, respectively, then the region was considered TP. Figure S6 (b) shows F1 scores for various thresholds. The F1 scores of  $CN_{Wabico}$  (black color) were consistently higher than those of  $CN_{BIC-Seq2}$  (blue color) at any GC bias severity (z values). Note that one CN deletion event from 49,235,360 base pair to 49,335,359 base pair was not identified by any methods because there are few markers having uniquely mappable positions in this genomic region.

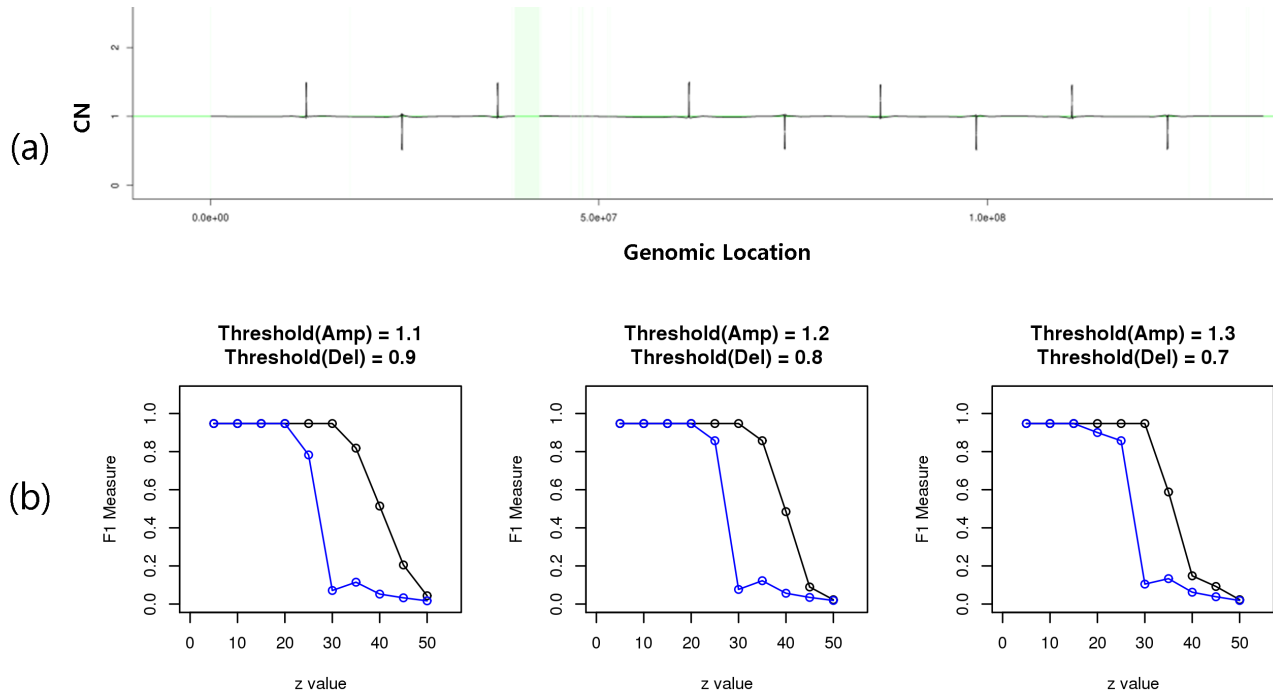

**Figure S6.** Simulated sequence data with CN variation and the F1 measures for detecting these events



## 2.4 The effect of multiresolution decomposition in real cancer data

Supplementary Figure S7 shows the estimated probability density plots of denoised  $CN$  ratio windows. Figure S7 (a) is the distribution of  $CN_{raw}$ , and Figure S7 (b), (c), and (d) presents the estimated distribution of  $CN_{Wabico}$  from the GC bias corrections with decomposition levels 1, 5, and 10. In Figure S7 (a), the peaks representing different  $CN$ s are not distinguishable due to severe GC bias. As the decomposition levels increase, the peaks become more distinguishable.

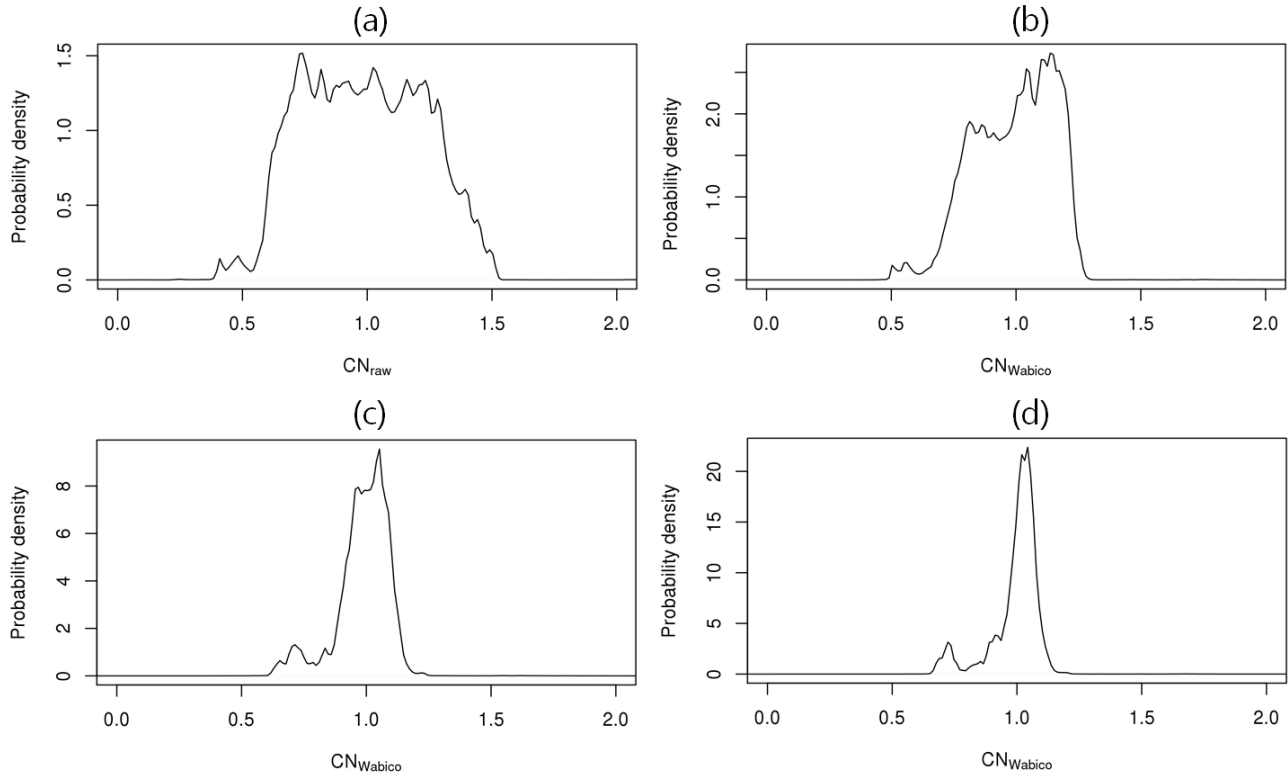

**Figure S7.** The distribution of  $CN$  values from TCGA 1444-01A samples

## 2.5 Standard deviations (SDs) of corrected *CN* signals from paired normal WGS data

We checked the GC bias correction performance using the WGS data of paired normal samples from the 37 patients with GBM. We used SDs as a measure of GC bias correction because  $DOC_{raw}$  in the normal sample is largely affected by GC bias but is less affected by structural variations such as *CN* variations. If Wabico controls GC bias better than other methods, the SDs yielded by  $CN_{Wabico}$  will be smaller than those from other methods. Table S1 indicates that the SD of  $CN_{Wabico}$  is smaller than that of  $CN_{BIC-Seq2}$  in most of the paired normal samples from the patients with GBM. This finding suggests that Wabico controls GC bias better than BIC-Seq2 does.

| TCGA-ID  | SDs           |                 | Smaller SDs |
|----------|---------------|-----------------|-------------|
|          | $CN_{Wabico}$ | $CN_{BIC-Seq2}$ |             |
| 0125-10A | 8.41615       | 8.65231         | Wabico      |
| 0145-10A | 8.73036       | 9.00338         | Wabico      |
| 0152-10A | 13.14883      | 17.12831        | Wabico      |
| 0157-10A | 6.11932       | 6.47396         | Wabico      |
| 0171-10A | 8.15080       | 8.31309         | Wabico      |
| 0185-10B | 10.87579      | 13.44248        | Wabico      |
| 0190-10B | 8.63151       | 8.87745         | Wabico      |
| 0210-10A | 11.68024      | 12.12270        | Wabico      |
| 0211-10A | 10.84795      | 11.21337        | Wabico      |
| 0214-10A | 12.17558      | 12.36649        | Wabico      |
| 0648-10A | 12.13205      | 12.45086        | Wabico      |
| 0686-10A | 12.00894      | 12.04671        | Wabico      |
| 0744-10A | 8.83298       | 8.94882         | Wabico      |
| 0745-10A | 10.33604      | 10.39009        | Wabico      |
| 1034-10A | 11.08199      | 11.34486        | Wabico      |
| 1389-10D | 9.89502       | 10.17476        | Wabico      |
| 1402-10A | 13.65831      | 13.95338        | Wabico      |
| 1444-10A | 10.33847      | 10.35900        | Wabico      |
| 1823-10A | 6.22274       | 6.39560         | Wabico      |
| 1831-10A | 11.67000      | 11.44439        | BIC-Seq2    |
| 1970-10A | 9.85956       | 10.16090        | Wabico      |
| 2483-10A | 6.61742       | 6.85258         | Wabico      |
| 2485-10A | 7.41802       | 7.47725         | Wabico      |
| 2523-10A | 10.01310      | 10.18712        | Wabico      |
| 2528-10A | 10.28809      | 10.48268        | Wabico      |
| 2554-10A | 5.13198       | 5.49989         | Wabico      |
| 2557-10A | 8.35728       | 8.47360         | Wabico      |
| 2570-10A | 10.47309      | 10.86494        | Wabico      |
| 2620-10A | 11.19813      | 11.31676        | Wabico      |
| 2624-10A | 9.68137       | 10.09514        | Wabico      |
| 2629-10A | 11.65936      | 11.86532        | Wabico      |
| 5132-10A | 9.16827       | 9.21296         | Wabico      |
| 5135-10A | 9.77682       | 9.77734         | Wabico      |
| 5411-10A | 10.81661      | 10.76831        | BIC-Seq2    |
| 5415-10A | 11.00828      | 11.17948        | Wabico      |
| 5651-10A | 5.48416       | 6.29573         | Wabico      |
| 5960-10A | 11.69929      | 11.94971        | Wabico      |

**Table S1.** A comparison of SDs between denoising results of Wabico and of the BIC-Seq2 normalization method for paired normal WGS samples from the patients with GBM

## 2.6 A comparison of GC correction methods for the identification of cancer-related genes with focal aberrations

In Tables 1, 2, and 3 in the main text, we revealed that Wabico identified most of the pairs of WGS cancer samples and cancer-related genes with focal aberrations for WGS datasets of three cancer types. In this section, we compared data on known cancer genes identified by a segmentation method after GC bias correction by BIC-Seq2–based expected read counts and by Wabico. Here, we ran the BIC-Seq2 segmentation program with  $\lambda = 25$  for all samples. The inputs of the BIC-Seq2 segmentation program for Wabico are  $DOC_{raw}$  and  $DOC_{i,GC}$ . The inputs for BIC-Seq2 are  $DOC_{raw}$  and  $DOC_{i,expected}$ . We first set the thresholds for  $CN$  amplification and deletion to 1.1 and 0.9, respectively. If the  $CN$  values of a BIC-Seq2 segment were greater than or less than the thresholds of  $CN$  amplification or deletion, the segment was regarded as  $CN$  amplification or deletion, respectively.

Tables S2, S3, and S4 present the numbers of genes identified by both methods, not identified by either method, those identified only by Wabico, and those identified only by the BIC-Seq2–based expected read count. In the GBM dataset, two alterations around genes *FGFR3* and *QKI* were identified only by Wabico. In the case of LUAD and OVC datasets, the numbers of genes identified by Wabico and BIC-Seq2 were the identical. This is because the cancer genes for this test were chosen conservatively: those occurring in both WGS and SNP6 datasets. Note that because the BIC-Seq2 segmentation method may not detect some focal aberrant regions or more genes, Wabico results in Supplementary Tables S2, S3, and S4 differ from those in Tables 1, 2, and 3 in the main text, in which a cancer gene was assumed to be identified if the two conditions in Section 2.2 of Supplementary Material were satisfied.

| Chr | Name   | Type | Total | Identified by both methods | Not identified by either method | Identified only by Wabico | Identified only by BIC-Seq2 expected read count |
|-----|--------|------|-------|----------------------------|---------------------------------|---------------------------|-------------------------------------------------|
| 1   | MDM4   | amp  | 6     | 5                          | 1                               | 0                         | 0                                               |
| 4   | FGFR3  | amp  | 4     | 2                          | 1                               | 1                         | 0                                               |
| 4   | PDGFRA | amp  | 6     | 6                          | 0                               | 0                         | 0                                               |
| 6   | QKI    | del  | 3     | 2                          | 0                               | 1                         | 0                                               |
| 7   | EGFR   | amp  | 23    | 22                         | 1                               | 0                         | 0                                               |
| 7   | CDK6   | amp  | 4     | 4                          | 0                               | 0                         | 0                                               |
| 9   | CDKN2A | del  | 14    | 14                         | 0                               | 0                         | 0                                               |
| 9   | CDKN2B | del  | 13    | 13                         | 0                               | 0                         | 0                                               |
| 10  | PTEN   | del  | 3     | 1                          | 2                               | 0                         | 0                                               |
| 10  | FGFR2  | amp  | 2     | 2                          | 0                               | 0                         | 0                                               |
| 12  | CCND2  | amp  | 2     | 2                          | 0                               | 0                         | 0                                               |
| 12  | CDK4   | amp  | 11    | 10                         | 1                               | 0                         | 0                                               |
| 12  | MDM2   | amp  | 7     | 7                          | 0                               | 0                         | 0                                               |
| 17  | GRB2   | amp  | 2     | 1                          | 1                               | 0                         | 0                                               |

**Table S2.**  $CN$ -altered GBM-related genes

| Chr | Name   | Type | Total | Identified by both methods | Not identified by either method | Identified only by Wabico | Identified only by BIC-Seq2 expected read count |
|-----|--------|------|-------|----------------------------|---------------------------------|---------------------------|-------------------------------------------------|
| 5   | TERT   | amp  | 2     | 1                          | 1                               | 0                         | 0                                               |
| 5   | PDE4D  | del  | 3     | 3                          | 0                               | 0                         | 0                                               |
| 9   | PTPRD  | del  | 2     | 1                          | 1                               | 0                         | 0                                               |
| 9   | CDKN2A | del  | 2     | 1                          | 1                               | 0                         | 0                                               |
| 12  | MDM2   | amp  | 2     | 2                          | 0                               | 0                         | 0                                               |
| 19  | CCNE1  | amp  | 2     | 2                          | 0                               | 0                         | 0                                               |

**Table S3.**  $CN$ -altered LUAD-related genes

| Chr | Name    | Type | Total | Identified by both methods | Not identified by either method | Identified only by Wabico | Identified only by BIC-Seq2 expected read count |
|-----|---------|------|-------|----------------------------|---------------------------------|---------------------------|-------------------------------------------------|
| 1   | MYCL    | amp  | 7     | 7                          | 0                               | 0                         | 0                                               |
| 1   | MCL1    | amp  | 4     | 4                          | 0                               | 0                         | 0                                               |
| 3   | MECOM   | amp  | 7     | 7                          | 0                               | 0                         | 0                                               |
| 4   | TACC3   | amp  | 5     | 5                          | 0                               | 0                         | 0                                               |
| 4   | ANKRD17 | amp  | 2     | 2                          | 0                               | 0                         | 0                                               |
| 5   | TERT    | amp  | 4     | 4                          | 0                               | 0                         | 0                                               |
| 6   | ID4     | amp  | 4     | 4                          | 0                               | 0                         | 0                                               |
| 8   | SOX17   | amp  | 7     | 7                          | 0                               | 0                         | 0                                               |
| 8   | MYC     | amp  | 16    | 16                         | 0                               | 0                         | 0                                               |
| 10  | PTEN    | del  | 6     | 6                          | 0                               | 0                         | 0                                               |
| 11  | ALG8    | amp  | 6     | 6                          | 0                               | 0                         | 0                                               |
| 12  | KRAS    | amp  | 4     | 4                          | 0                               | 0                         | 0                                               |
| 13  | RB1     | del  | 4     | 4                          | 0                               | 0                         | 0                                               |
| 14  | METTL17 | amp  | 3     | 3                          | 0                               | 0                         | 0                                               |
| 17  | NF1     | del  | 3     | 3                          | 0                               | 0                         | 0                                               |
| 19  | CCNE1   | amp  | 16    | 16                         | 0                               | 0                         | 0                                               |

**Table S4.** *CN*-altered OVC-related genes

## 2.7 Correlation with TCGA level 3 segments

We also checked the GC bias correction performance based on the correlation between the *CN* ratio signal from cancer WGS data corrected by Wabico or by the other method and TCGA level 3 segments from SNP6 microarray data. The correlation was calculated from most of the markers of the whole genome. Tables S5, S6, S7 present the results of correlation comparisons. The correlations between denoised  $CN_{Wabico}$  and the level 3 segments were higher than the correlations between  $CN_{BIC-Seq2}$  and the level 3 segments for all three cancer datasets.

| Decomposition level | TCGA-ID  | The number of markers | Correlation Wabico | Correlation BIC-Seq2 expected read counts | Higher Correlation |
|---------------------|----------|-----------------------|--------------------|-------------------------------------------|--------------------|
| 10                  | 0125-01A | 22625771              | 0.74695            | 0.74616                                   | Wabico             |
| 9                   | 0171-01A | 22631143              | 0.84178            | 0.83887                                   | Wabico             |
| 6                   | 0190-01A | 22630269              | 0.79130            | 0.77644                                   | Wabico             |
| 9                   | 0210-01A | 22625702              | 0.90437            | 0.90074                                   | Wabico             |
| 7                   | 0211-01A | 22627501              | 0.70366            | 0.70345                                   | Wabico             |
| 6                   | 0214-01A | 22631765              | 0.90261            | 0.89866                                   | Wabico             |
| 9                   | 0686-01A | 22629667              | 0.75410            | 0.74854                                   | Wabico             |
| 9                   | 0744-01A | 22623955              | 0.62172            | 0.61785                                   | Wabico             |
| 9                   | 0745-01A | 22630160              | 0.74717            | 0.74528                                   | Wabico             |
| 4                   | 1034-01A | 22627351              | 0.91839            | 0.91388                                   | Wabico             |
| 6                   | 1389-01A | 22620301              | 0.70999            | 0.70971                                   | Wabico             |
| 9                   | 1402-01A | 22619202              | 0.87348            | 0.87339                                   | Wabico             |
| 10                  | 1444-01A | 22626541              | 0.72705            | 0.67039                                   | Wabico             |
| 10                  | 1823-01A | 22625406              | 0.81437            | 0.77784                                   | Wabico             |
| 9                   | 1831-01A | 22625072              | 0.76013            | 0.75957                                   | Wabico             |
| 9                   | 1970-01A | 22620896              | 0.86389            | 0.85905                                   | Wabico             |
| 10                  | 2483-01A | 22624820              | 0.86174            | 0.84393                                   | Wabico             |
| 10                  | 2485-01A | 22626295              | 0.92895            | 0.91557                                   | Wabico             |
| 10                  | 2523-01A | 22627309              | 0.74920            | 0.74473                                   | Wabico             |
| 9                   | 2528-01A | 22623819              | 0.90962            | 0.89178                                   | Wabico             |
| 9                   | 2554-01A | 22625032              | 0.83224            | 0.82550                                   | Wabico             |
| 9                   | 2557-01A | 22622928              | 0.86343            | 0.83415                                   | Wabico             |
| 10                  | 2570-01A | 22627954              | 0.88411            | 0.87794                                   | Wabico             |
| 9                   | 2620-01A | 22622952              | 0.90755            | 0.88536                                   | Wabico             |
| 9                   | 2629-01A | 22630285              | 0.91977            | 0.91659                                   | Wabico             |
| 9                   | 5132-01A | 22630706              | 0.65878            | 0.65802                                   | Wabico             |
| 10                  | 5135-01A | 22626581              | 0.89185            | 0.88995                                   | Wabico             |
| 10                  | 5411-01A | 22631275              | 0.93046            | 0.92763                                   | Wabico             |
| 4                   | 5415-01A | 22627619              | 0.79557            | 0.79448                                   | Wabico             |
| 10                  | 5651-01A | 22627308              | 0.92028            | 0.91787                                   | Wabico             |
| 4                   | 0145-01A | 22629188              | 0.72399            | 0.72693                                   | BIC-Seq2           |
| 4                   | 0152-01A | 22628657              | 0.79874            | 0.81055                                   | BIC-Seq2           |
| 9                   | 0157-01A | 22631260              | 0.78187            | 0.79701                                   | BIC-Seq2           |
| 4                   | 0185-01A | 22631658              | 0.81301            | 0.82461                                   | BIC-Seq2           |
| 4                   | 0648-01A | 22626194              | 0.78466            | 0.79311                                   | BIC-Seq2           |
| 9                   | 2624-01A | 22628568              | 0.88774            | 0.88785                                   | BIC-Seq2           |
| 3                   | 5960-01A | 22626625              | 0.82487            | 0.82526                                   | BIC-Seq2           |

**Table S5.** A correlation comparison between denoising results of Wabico and of the BIC-Seq2 normalization method among TCGA patients with GBM

| Decomposition level | TCGA-ID  | The number of markers | Correlation Wabico | Correlation BIC-Seq2 expected read counts | Higher Correlation |
|---------------------|----------|-----------------------|--------------------|-------------------------------------------|--------------------|
| 9                   | 1678-01A | 22626932              | 0.93599            | 0.92184                                   | Wabico             |
| 9                   | 1680-01A | 22630112              | 0.80433            | 0.15984                                   | Wabico             |
| 9                   | 2659-01A | 22630085              | 0.94380            | 0.74516                                   | Wabico             |
| 6                   | 4389-01A | 22623089              | 0.88700            | 0.86593                                   | Wabico             |
| 10                  | 4395-01A | 22625708              | 0.96067            | 0.95929                                   | Wabico             |
| 9                   | 4397-01A | 22625865              | 0.94850            | 0.54057                                   | Wabico             |
| 9                   | 4398-01A | 22629115              | 0.91197            | 0.86729                                   | Wabico             |
| 9                   | 4420-01A | 22625026              | 0.90734            | 0.81480                                   | Wabico             |
| 9                   | 4422-01A | 22622926              | 0.91878            | 0.90164                                   | Wabico             |
| 4                   | 4432-01A | 19310353              | 0.86456            | 0.56788                                   | Wabico             |
| 10                  | 5066-01A | 22632040              | 0.57079            | 0.55961                                   | Wabico             |
| 10                  | 5147-01A | 22628556              | 0.91424            | 0.89713                                   | Wabico             |
| 10                  | 5429-01A | 22624208              | 0.79308            | 0.78263                                   | Wabico             |
| 10                  | 6203-01A | 22632952              | 0.49125            | 0.40877                                   | Wabico             |
| 3                   | 6215-01A | 22631412              | 0.89621            | 0.89368                                   | Wabico             |
| 10                  | 6597-01A | 22629794              | 0.92709            | 0.92684                                   | Wabico             |
| 10                  | 6840-01A | 22628201              | 0.94712            | 0.94668                                   | Wabico             |
| 4                   | 7030-01A | 22632437              | 0.21575            | 0.19900                                   | Wabico             |
| 10                  | 7146-01A | 22622942              | 0.95254            | 0.95228                                   | Wabico             |
| 10                  | 7156-01A | 22631118              | 0.87690            | 0.86745                                   | Wabico             |
| 4                   | 7158-01A | 22629705              | 0.93027            | 0.92891                                   | Wabico             |
| 2                   | 7281-01A | 22627941              | 0.81813            | 0.81805                                   | Wabico             |
| 4                   | 8171-01A | 22624532              | 0.93504            | 0.93355                                   | Wabico             |
| 6                   | 8299-01A | 22631464              | 0.30993            | 0.29978                                   | Wabico             |
| 5                   | 4396-01A | 22628313              | 0.93853            | 0.94005                                   | BIC-Seq2           |
| 9                   | 6148-01A | 22630998              | 0.49032            | 0.49467                                   | BIC-Seq2           |
| 10                  | 7143-01A | 22632203              | 0.92474            | 0.92592                                   | BIC-Seq2           |
| 10                  | 7535-01A | 22629061              | 0.92682            | 0.92727                                   | BIC-Seq2           |

**Table S6.** A correlation comparison between denoising results of Wabico and of the BIC-Seq2 normalization method among TCGA patients with LUAD

| Decomposition level | TCGA-ID  | The number of markers | Correlation Wabico | Correlation BIC-Seq2 expected read counts | Higher Correlation |
|---------------------|----------|-----------------------|--------------------|-------------------------------------------|--------------------|
| 5                   | 0937-01A | 22630047              | 0.89750            | 0.88973                                   | Wabico             |
| 10                  | 1103-01A | 22620527              | 0.30826            | 0.29990                                   | Wabico             |
| 4                   | 1110-01A | 22622390              | 0.90271            | 0.89675                                   | Wabico             |
| 10                  | 1118-01A | 22620989              | 0.83635            | 0.79271                                   | Wabico             |
| 9                   | 1331-01A | 22626256              | 0.71349            | 0.68744                                   | Wabico             |
| 3                   | 1347-01A | 22627157              | 0.83732            | 0.83011                                   | Wabico             |
| 9                   | 1349-01A | 22630118              | 0.84986            | 0.82543                                   | Wabico             |
| 9                   | 1367-01A | 22628864              | 0.79912            | 0.77501                                   | Wabico             |
| 4                   | 1419-01A | 22627522              | 0.80427            | 0.80135                                   | Wabico             |
| 10                  | 1487-01A | 22618665              | 0.86635            | 0.86536                                   | Wabico             |
| 3                   | 1514-01A | 22624418              | 0.85009            | 0.84306                                   | Wabico             |
| 3                   | 1548-01A | 22622391              | 0.92173            | 0.91324                                   | Wabico             |
| 3                   | 1552-01A | 22619514              | 0.89411            | 0.88990                                   | Wabico             |
| 7                   | 1557-01A | 22616063              | 0.92939            | 0.92743                                   | Wabico             |
| 4                   | 1558-01A | 22619862              | 0.89759            | 0.89479                                   | Wabico             |
| 5                   | 1570-01A | 22618494              | 0.73106            | 0.72599                                   | Wabico             |
| 4                   | 1571-01A | 22625573              | 0.88744            | 0.88315                                   | Wabico             |
| 5                   | 1574-01A | 22620796              | 0.91430            | 0.90933                                   | Wabico             |
| 3                   | 1632-01A | 22625070              | 0.89318            | 0.89191                                   | Wabico             |
| 8                   | 1666-01A | 22618236              | 0.89285            | 0.87768                                   | Wabico             |
| 4                   | 2000-01A | 22608363              | 0.90242            | 0.89948                                   | Wabico             |
| 7                   | 2024-01A | 22622395              | 0.87427            | 0.86323                                   | Wabico             |
| 4                   | 2045-01A | 22622572              | 0.77135            | 0.76298                                   | Wabico             |
| 4                   | 2290-01A | 22619634              | 0.83968            | 0.82642                                   | Wabico             |
| 5                   | 2391-01A | 22624850              | 0.86298            | 0.85531                                   | Wabico             |
| 4                   | 0723-01A | 22621857              | 0.85925            | 0.87614                                   | BIC-Seq2           |
| 7                   | 0727-01A | 22624670              | 0.94080            | 0.94115                                   | BIC-Seq2           |
| 9                   | 0751-01A | 22623404              | 0.77046            | 0.78002                                   | BIC-Seq2           |
| 9                   | 0890-01A | 22627744              | 0.91453            | 0.91598                                   | BIC-Seq2           |
| 9                   | 0906-01A | 22626531              | 0.93535            | 0.93870                                   | BIC-Seq2           |
| 9                   | 0912-01A | 22626121              | 0.92328            | 0.92462                                   | BIC-Seq2           |
| 9                   | 0934-01A | 22622161              | 0.81137            | 0.81411                                   | BIC-Seq2           |
| 9                   | 0938-01A | 22627646              | 0.94031            | 0.94565                                   | BIC-Seq2           |
| 4                   | 0980-01A | 22628616              | 0.86281            | 0.88106                                   | BIC-Seq2           |
| 10                  | 0982-01A | 22626987              | 0.43752            | 0.44537                                   | BIC-Seq2           |
| 6                   | 1124-01A | 22618611              | 0.93246            | 0.93333                                   | BIC-Seq2           |
| 3                   | 1411-01A | 22628819              | 0.82609            | 0.85178                                   | BIC-Seq2           |
| 10                  | 1466-01A | 22609694              | 0.90455            | 0.90635                                   | BIC-Seq2           |
| 8                   | 1477-01A | 22629530              | 0.80168            | 0.80325                                   | BIC-Seq2           |
| 10                  | 1491-01A | 22621971              | 0.92001            | 0.92346                                   | BIC-Seq2           |
| 10                  | 1542-01A | 22625299              | 0.92702            | 0.93046                                   | BIC-Seq2           |
| 9                   | 1544-01A | 22620119              | 0.91634            | 0.92072                                   | BIC-Seq2           |
| 6                   | 1562-01A | 22627541              | 0.88394            | 0.88476                                   | BIC-Seq2           |
| 9                   | 1614-01A | 22623535              | 0.92920            | 0.93528                                   | BIC-Seq2           |
| 10                  | 1634-01A | 22623101              | 0.93316            | 0.93670                                   | BIC-Seq2           |
| 10                  | 2050-01A | 22619652              | 0.87853            | 0.88186                                   | BIC-Seq2           |
| 10                  | 2400-01A | 22620683              | 0.90527            | 0.90654                                   | BIC-Seq2           |

**Table S7.** A correlation comparison between denoising results of Wabico and those of the BIC-Seq2 normalization method among TCGA patients with OVC

## 2.8 Comparisons of *CN* segments after GC correction

We compared the performance of GC bias correction methods by segmentation results. For *CN* segmentation, we used a BIC-Seq2 segmentation algorithm with  $\lambda = 25$  for all the samples. The inputs of the BIC-Seq2 segmentation program for Wabico were  $DOC_{raw}$  and  $DOC_{i,GC}$ . The inputs for BIC-Seq2 were  $DOC_{raw}$  and  $DOC_{i,expected}$ . We compared these segments obtained after application of different GC bias correction methods to the SNP level 3 segment for the same samples from TCGA cancer patients. We determined whether the segment from WGS data is TP, FP, TN, or FN according to the threshold and the overlapping segment from SNP array level 3 data. We set the thresholds for *CN* amplification to 1.1, and *CN* deletion to 0.9. SNP array level 3 segments having *CN* values greater than the amplification threshold were considered true amplification, and those smaller than the deletion threshold were regarded as a true deletion. Similarly, the WGS segments were predicted as amplification or deletion on the basis of the threshold, and these predicted WGS segments were compared with SNP array segments for calculating precision, recall, and F1-scores. Before we applied the above measures to the WGS segments, we made the genomic ranges of segments from Wabico equal to the genomic ranges of segments from BIC-Seq2 by dividing the original segments into subsegments to make the comparison conditions the same. When the segment from Wabico overlapped with the segment of BIC-Seq2, these segments were divided into subsegments. One subsegment consisted of overlapping parts in the original segment, and the other subsegments consisted of nonoverlapping parts in the original segment. Then, because this subsegmentation generated too many small segments, we excluded segments whose size was less than 10,000 base pairs for the comparison so that the performance was not affected by these small segments. Tables S8, S9, and S10 show the results on precision, recall, and F1-scores calculated from TP, FP, TN, and FN. Wabico yielded higher F1 scores for more WGS samples than did the BIC-Seq2-based expected read count for all three cancer types.



| TCGA-ID  | Num<br>CN Segs | Prec<br>Wabico | Prec<br>BIC2 | Prec<br>Better | Racall<br>Wabico | Recall<br>BIC2 | Recall<br>Better | F1<br>Wabico | F1<br>BIC2 | F1<br>Better |
|----------|----------------|----------------|--------------|----------------|------------------|----------------|------------------|--------------|------------|--------------|
| 0125-01A | 139            | 0.7692         | 0.7692       | SAME           | 0.8929           | 0.8929         | SAME             | 0.8264       | 0.8264     | SAME         |
| 0145-01A | 169            | 0.7857         | 0.8077       | BIC-Seq2       | 0.8919           | 0.8514         | Wabico           | 0.8354       | 0.8289     | Wabico       |
| 0152-01A | 94             | 0.9242         | 0.9492       | BIC-Seq2       | 0.9104           | 0.8358         | Wabico           | 0.9173       | 0.8889     | Wabico       |
| 0157-01A | 88             | 0.8378         | 0.8611       | BIC-Seq2       | 0.8857           | 0.8857         | SAME             | 0.8611       | 0.8732     | BIC-Seq2     |
| 0171-01A | 152            | 0.7436         | 0.7467       | BIC-Seq2       | 0.8657           | 0.8358         | Wabico           | 0.8000       | 0.7887     | Wabico       |
| 0185-01A | 93             | 0.8163         | 0.8444       | BIC-Seq2       | 0.9302           | 0.8837         | Wabico           | 0.8696       | 0.8636     | Wabico       |
| 0190-01A | 156            | 0.7297         | 0.7286       | Wabico         | 0.8060           | 0.7612         | Wabico           | 0.7660       | 0.7445     | Wabico       |
| 0210-01A | 125            | 0.7966         | 0.7966       | SAME           | 0.9038           | 0.9038         | SAME             | 0.8468       | 0.8468     | SAME         |
| 0211-01A | 138            | 0.8933         | 0.8933       | SAME           | 0.9437           | 0.9437         | SAME             | 0.9178       | 0.9178     | SAME         |
| 0214-01A | 130            | 0.7031         | 0.7541       | BIC-Seq2       | 0.8654           | 0.8846         | BIC-Seq2         | 0.7759       | 0.8142     | BIC-Seq2     |
| 0648-01A | 119            | 0.7910         | 0.8125       | BIC-Seq2       | 0.9464           | 0.9286         | Wabico           | 0.8618       | 0.8667     | BIC-Seq2     |
| 0686-01A | 187            | 0.9211         | 0.8908       | Wabico         | 0.9130           | 0.9217         | BIC-Seq2         | 0.9170       | 0.9060     | Wabico       |
| 0744-01A | 139            | 0.8889         | 0.8571       | Wabico         | 0.9275           | 0.8696         | Wabico           | 0.9078       | 0.8633     | Wabico       |
| 0745-01A | 132            | 0.7260         | 0.7324       | BIC-Seq2       | 0.8983           | 0.8814         | Wabico           | 0.8030       | 0.8000     | Wabico       |
| 1034-01A | 116            | 0.8333         | 0.8305       | Wabico         | 0.8621           | 0.8448         | Wabico           | 0.8475       | 0.8376     | Wabico       |
| 1389-01A | 120            | 0.6275         | 0.6122       | Wabico         | 0.8000           | 0.7500         | Wabico           | 0.7033       | 0.6742     | Wabico       |
| 1402-01A | 106            | 0.7667         | 0.7931       | BIC-Seq2       | 0.9583           | 0.9583         | SAME             | 0.8519       | 0.8679     | BIC-Seq2     |
| 1444-01A | 172            | 0.5231         | 0.6034       | BIC-Seq2       | 0.7391           | 0.7609         | BIC-Seq2         | 0.6126       | 0.6731     | BIC-Seq2     |
| 1823-01A | 210            | 0.9452         | 0.9527       | BIC-Seq2       | 0.7419           | 0.8656         | BIC-Seq2         | 0.8313       | 0.9070     | BIC-Seq2     |
| 1831-01A | 86             | 0.7353         | 0.7353       | SAME           | 0.8065           | 0.8065         | SAME             | 0.7692       | 0.7692     | SAME         |
| 1970-01A | 99             | 0.8644         | 0.8667       | BIC-Seq2       | 0.8644           | 0.8814         | BIC-Seq2         | 0.8644       | 0.8739     | BIC-Seq2     |
| 2483-01A | 433            | 0.6552         | 0.7074       | BIC-Seq2       | 0.8313           | 0.8313         | SAME             | 0.7328       | 0.7644     | BIC-Seq2     |
| 2485-01A | 92             | 0.9091         | 0.9268       | BIC-Seq2       | 0.8511           | 0.8085         | Wabico           | 0.8791       | 0.8636     | Wabico       |
| 2523-01A | 145            | 0.7547         | 0.7414       | Wabico         | 0.8163           | 0.8776         | BIC-Seq2         | 0.7843       | 0.8037     | BIC-Seq2     |
| 2528-01A | 147            | 0.8281         | 0.7910       | Wabico         | 0.8833           | 0.8833         | SAME             | 0.8548       | 0.8346     | Wabico       |
| 2554-01A | 99             | 0.8958         | 0.8936       | Wabico         | 0.8958           | 0.8750         | Wabico           | 0.8958       | 0.8842     | Wabico       |
| 2557-01A | 113            | 0.8750         | 0.7887       | Wabico         | 0.9180           | 0.9180         | SAME             | 0.8960       | 0.8485     | Wabico       |
| 2570-01A | 108            | 0.5526         | 0.5263       | Wabico         | 0.8750           | 0.8333         | Wabico           | 0.6774       | 0.6452     | Wabico       |
| 2620-01A | 108            | 0.7292         | 0.7955       | BIC-Seq2       | 0.8333           | 0.8333         | SAME             | 0.7778       | 0.8140     | BIC-Seq2     |
| 2624-01A | 101            | 0.8491         | 0.8600       | BIC-Seq2       | 0.9184           | 0.8776         | Wabico           | 0.8824       | 0.8687     | Wabico       |
| 2629-01A | 111            | 0.8500         | 0.8833       | BIC-Seq2       | 0.5862           | 0.6092         | BIC-Seq2         | 0.6939       | 0.7211     | BIC-Seq2     |
| 5132-01A | 162            | 0.8243         | 0.9077       | BIC-Seq2       | 0.8026           | 0.7763         | Wabico           | 0.8133       | 0.8369     | BIC-Seq2     |
| 5135-01A | 194            | 0.8222         | 0.8427       | BIC-Seq2       | 0.9367           | 0.9494         | BIC-Seq2         | 0.8757       | 0.8929     | BIC-Seq2     |
| 5411-01A | 186            | 0.6029         | 0.5821       | Wabico         | 0.9111           | 0.8667         | Wabico           | 0.7257       | 0.6964     | Wabico       |
| 5415-01A | 164            | 0.8049         | 0.8125       | BIC-Seq2       | 0.9041           | 0.8904         | Wabico           | 0.8516       | 0.8497     | Wabico       |
| 5651-01A | 203            | 0.8161         | 0.7640       | Wabico         | 0.8068           | 0.7727         | Wabico           | 0.8114       | 0.7684     | Wabico       |
| 5960-01A | 139            | 0.9639         | 0.9639       | SAME           | 0.6504           | 0.6504         | SAME             | 0.7767       | 0.7767     | SAME         |

**Table S8.** A comparison on precision, recall, and F1-scores of segments from Wabico and BIC-Seq2 for TCGA patients with GBM

| TCGA-ID  | Num<br>CN Segs | Prec<br>Wabico | Prec<br>BIC2 | Prec<br>Better | Recall<br>Wabico | Recall<br>BIC2 | Recall<br>Better | F1<br>Wabico | F1<br>BIC2 | F1<br>Better |
|----------|----------------|----------------|--------------|----------------|------------------|----------------|------------------|--------------|------------|--------------|
| 1678-01A | 129            | 0.9494         | 0.9481       | Wabico         | 0.9259           | 0.9012         | Wabico           | 0.9375       | 0.9241     | Wabico       |
| 1680-01A | 64             | 0.8056         | 0.7667       | Wabico         | 0.8788           | 0.6970         | Wabico           | 0.8406       | 0.7302     | Wabico       |
| 2659-01A | 82             | 0.9070         | 0.8824       | Wabico         | 0.7091           | 0.8182         | BIC-Seq2         | 0.7959       | 0.8491     | BIC-Seq2     |
| 4389-01A | 145            | 0.8750         | 0.8621       | Wabico         | 0.7549           | 0.7353         | Wabico           | 0.8105       | 0.7937     | Wabico       |
| 4395-01A | 165            | 0.8952         | 0.8785       | Wabico         | 0.8468           | 0.8468         | SAME             | 0.8704       | 0.8624     | Wabico       |
| 4396-01A | 170            | 0.9785         | 0.9783       | Wabico         | 0.6947           | 0.6870         | Wabico           | 0.8125       | 0.8072     | Wabico       |
| 4397-01A | 197            | 0.7812         | 0.8065       | BIC-Seq2       | 0.8621           | 0.8621         | SAME             | 0.8197       | 0.8333     | BIC-Seq2     |
| 4398-01A | 227            | 0.8284         | 0.8952       | BIC-Seq2       | 0.8740           | 0.8740         | SAME             | 0.8506       | 0.8845     | BIC-Seq2     |
| 4420-01A | 304            | 0.7250         | 0.7559       | BIC-Seq2       | 0.7178           | 0.7970         | BIC-Seq2         | 0.7214       | 0.7759     | BIC-Seq2     |
| 4422-01A | 189            | 0.8762         | 0.8559       | Wabico         | 0.9200           | 0.9500         | BIC-Seq2         | 0.8976       | 0.9005     | BIC-Seq2     |
| 4432-01A | 149            | 0.9670         | 0.9438       | Wabico         | 0.8224           | 0.7850         | Wabico           | 0.8889       | 0.8571     | Wabico       |
| 5066-01A | 637            | 0.2953         | 0.2627       | Wabico         | 0.7732           | 0.6907         | Wabico           | 0.4274       | 0.3807     | Wabico       |
| 5147-01A | 486            | 0.8340         | 0.7584       | Wabico         | 0.8340           | 0.7698         | Wabico           | 0.8340       | 0.7640     | Wabico       |
| 5429-01A | 148            | 0.7097         | 0.7667       | BIC-Seq2       | 0.8148           | 0.8519         | BIC-Seq2         | 0.7586       | 0.8070     | BIC-Seq2     |
| 6148-01A | 67             | 0.4706         | 0.4706       | SAME           | 1.0000           | 1.0000         | SAME             | 0.6400       | 0.6400     | SAME         |
| 6203-01A | 1982           | 0.3189         | 0.2909       | Wabico         | 0.4591           | 0.4715         | BIC-Seq2         | 0.3764       | 0.3598     | Wabico       |
| 6215-01A | 108            | 0.9348         | 0.9348       | SAME           | 0.8958           | 0.8958         | SAME             | 0.9149       | 0.9149     | SAME         |
| 6597-01A | 196            | 0.8496         | 0.8485       | Wabico         | 0.8760           | 0.8682         | Wabico           | 0.8626       | 0.8582     | Wabico       |
| 6840-01A | 225            | 0.9107         | 0.9107       | SAME           | 0.8453           | 0.8453         | SAME             | 0.8768       | 0.8768     | SAME         |
| 7030-01A | 77             | 0.2857         | 0.3636       | BIC-Seq2       | 0.5714           | 0.5714         | SAME             | 0.3810       | 0.4444     | BIC-Seq2     |
| 7143-01A | 148            | 0.6753         | 0.7183       | BIC-Seq2       | 0.8387           | 0.8226         | Wabico           | 0.7482       | 0.7669     | BIC-Seq2     |
| 7146-01A | 274            | 0.9840         | 0.9842       | BIC-Seq2       | 0.7541           | 0.7664         | BIC-Seq2         | 0.8538       | 0.8618     | BIC-Seq2     |
| 7156-01A | 172            | 0.6197         | 0.5946       | Wabico         | 0.8800           | 0.8800         | SAME             | 0.7273       | 0.7097     | Wabico       |
| 7158-01A | 81             | 0.7692         | 0.8333       | BIC-Seq2       | 0.9524           | 0.9524         | SAME             | 0.8511       | 0.8889     | BIC-Seq2     |
| 7281-01A | 79             | 0.8261         | 0.8372       | BIC-Seq2       | 0.8636           | 0.8182         | Wabico           | 0.8444       | 0.8276     | Wabico       |
| 7535-01A | 109            | 0.9294         | 0.9286       | Wabico         | 0.8587           | 0.8478         | Wabico           | 0.8927       | 0.8864     | Wabico       |
| 8171-01A | 257            | 0.9837         | 0.9836       | Wabico         | 0.9731           | 0.9677         | Wabico           | 0.9784       | 0.9756     | Wabico       |
| 8299-01A | 95             | 0.2308         | 0.2308       | SAME           | 1.0000           | 1.0000         | SAME             | 0.3750       | 0.3750     | SAME         |

**Table S9.** A comparison on precision, recall, and F1-scores of segments from Wabico and BIC-Seq2 among TCGA patients with LUAD

| TCGA-ID  | Num<br>CN Segs | Prec<br>Wabico | Prec<br>BIC2 | Prec<br>Better | Racall<br>Wabico | Recall<br>BIC2 | Recall<br>Better | F1<br>Wabico | F1<br>BIC2 | F1<br>Better |
|----------|----------------|----------------|--------------|----------------|------------------|----------------|------------------|--------------|------------|--------------|
| 0723-01A | 978            | 0.9439         | 0.9457       | BIC-Seq2       | 0.8913           | 0.8970         | BIC-Seq2         | 0.9169       | 0.9207     | BIC-Seq2     |
| 0727-01A | 940            | 0.8619         | 0.8673       | BIC-Seq2       | 0.9402           | 0.9459         | BIC-Seq2         | 0.8994       | 0.9049     | BIC-Seq2     |
| 0751-01A | 2467           | 0.9866         | 0.9774       | Wabico         | 0.7858           | 0.7939         | BIC-Seq2         | 0.8749       | 0.8762     | BIC-Seq2     |
| 0890-01A | 1577           | 0.9513         | 0.9574       | BIC-Seq2       | 0.6059           | 0.6120         | BIC-Seq2         | 0.7403       | 0.7467     | BIC-Seq2     |
| 0906-01A | 1173           | 0.9773         | 0.9787       | BIC-Seq2       | 0.5816           | 0.5807         | Wabico           | 0.7292       | 0.7289     | Wabico       |
| 0912-01A | 1025           | 0.9937         | 0.9917       | Wabico         | 0.5113           | 0.5113         | SAME             | 0.6752       | 0.6747     | Wabico       |
| 0934-01A | 1148           | 0.8836         | 0.8832       | Wabico         | 0.9705           | 0.9672         | Wabico           | 0.9250       | 0.9233     | Wabico       |
| 0937-01A | 1048           | 0.9759         | 0.9759       | Wabico         | 0.6969           | 0.6945         | Wabico           | 0.8132       | 0.8115     | Wabico       |
| 0938-01A | 1108           | 0.9611         | 0.9646       | BIC-Seq2       | 0.7822           | 0.7802         | Wabico           | 0.8625       | 0.8626     | BIC-Seq2     |
| 0980-01A | 110            | 0.8136         | 0.8103       | Wabico         | 0.8421           | 0.8246         | Wabico           | 0.8276       | 0.8174     | Wabico       |
| 0982-01A | 2661           | 0.9709         | 0.9773       | BIC-Seq2       | 0.9025           | 0.9114         | BIC-Seq2         | 0.9354       | 0.9432     | BIC-Seq2     |
| 1103-01A | 5002           | 0.9616         | 0.9551       | Wabico         | 0.6521           | 0.6680         | BIC-Seq2         | 0.7772       | 0.7862     | BIC-Seq2     |
| 1110-01A | 1035           | 0.9305         | 0.9400       | BIC-Seq2       | 0.9535           | 0.9564         | BIC-Seq2         | 0.9419       | 0.9481     | BIC-Seq2     |
| 1118-01A | 1395           | 0.9112         | 0.9191       | BIC-Seq2       | 0.7011           | 0.7002         | Wabico           | 0.7925       | 0.7948     | BIC-Seq2     |
| 1124-01A | 1156           | 0.8691         | 0.8714       | BIC-Seq2       | 0.9122           | 0.9077         | Wabico           | 0.8901       | 0.8891     | Wabico       |
| 1331-01A | 1435           | 0.9368         | 0.9347       | Wabico         | 0.6953           | 0.6847         | Wabico           | 0.7982       | 0.7904     | Wabico       |
| 1347-01A | 1175           | 0.9042         | 0.9126       | BIC-Seq2       | 0.8822           | 0.8981         | BIC-Seq2         | 0.8931       | 0.9053     | BIC-Seq2     |
| 1349-01A | 1126           | 0.9060         | 0.9046       | Wabico         | 0.7308           | 0.7393         | BIC-Seq2         | 0.8090       | 0.8136     | BIC-Seq2     |
| 1367-01A | 1167           | 0.9770         | 0.9768       | Wabico         | 0.5540           | 0.5497         | Wabico           | 0.7071       | 0.7035     | Wabico       |
| 1411-01A | 124            | 0.8889         | 0.8919       | BIC-Seq2       | 0.8571           | 0.7857         | Wabico           | 0.8727       | 0.8354     | Wabico       |
| 1419-01A | 1219           | 0.9510         | 0.9510       | SAME           | 0.5980           | 0.5980         | SAME             | 0.7343       | 0.7343     | SAME         |
| 1466-01A | 1901           | 0.8818         | 0.8824       | BIC-Seq2       | 0.9057           | 0.9057         | SAME             | 0.8936       | 0.8939     | BIC-Seq2     |
| 1477-01A | 951            | 0.8821         | 0.8785       | Wabico         | 0.9234           | 0.9234         | SAME             | 0.9023       | 0.9004     | Wabico       |
| 1487-01A | 1509           | 0.9914         | 0.9922       | BIC-Seq2       | 0.7059           | 0.6943         | Wabico           | 0.8247       | 0.8170     | Wabico       |
| 1491-01A | 1237           | 0.9934         | 0.9932       | Wabico         | 0.6101           | 0.5906         | Wabico           | 0.7559       | 0.7407     | Wabico       |
| 1514-01A | 1026           | 0.9336         | 0.9334       | Wabico         | 0.7108           | 0.7086         | Wabico           | 0.8071       | 0.8056     | Wabico       |
| 1542-01A | 1362           | 0.9843         | 0.9861       | BIC-Seq2       | 0.9700           | 0.9700         | SAME             | 0.9771       | 0.9780     | BIC-Seq2     |
| 1544-01A | 1385           | 0.9573         | 0.9681       | BIC-Seq2       | 0.9671           | 0.9661         | Wabico           | 0.9622       | 0.9671     | BIC-Seq2     |
| 1548-01A | 864            | 0.9908         | 0.9908       | BIC-Seq2       | 0.7948           | 0.7960         | BIC-Seq2         | 0.8820       | 0.8828     | BIC-Seq2     |
| 1552-01A | 1091           | 0.9902         | 0.9916       | BIC-Seq2       | 0.6711           | 0.6721         | BIC-Seq2         | 0.8000       | 0.8011     | BIC-Seq2     |
| 1557-01A | 1360           | 0.8762         | 0.8751       | Wabico         | 0.8873           | 0.8853         | Wabico           | 0.8817       | 0.8802     | Wabico       |
| 1558-01A | 988            | 0.8478         | 0.8489       | BIC-Seq2       | 0.8935           | 0.8935         | SAME             | 0.8700       | 0.8706     | BIC-Seq2     |
| 1562-01A | 1166           | 0.9906         | 0.9925       | BIC-Seq2       | 0.4626           | 0.4634         | BIC-Seq2         | 0.6306       | 0.6318     | BIC-Seq2     |
| 1570-01A | 1319           | 0.9729         | 0.9729       | Wabico         | 0.9473           | 0.9459         | Wabico           | 0.9599       | 0.9592     | Wabico       |
| 1571-01A | 1011           | 0.9377         | 0.9445       | BIC-Seq2       | 0.9543           | 0.9543         | SAME             | 0.9459       | 0.9494     | BIC-Seq2     |
| 1574-01A | 903            | 0.9686         | 0.9705       | BIC-Seq2       | 0.6168           | 0.6155         | Wabico           | 0.7537       | 0.7533     | Wabico       |
| 1614-01A | 1111           | 0.8922         | 0.8927       | BIC-Seq2       | 0.6936           | 0.6966         | BIC-Seq2         | 0.7805       | 0.7826     | BIC-Seq2     |
| 1632-01A | 1177           | 0.7900         | 0.7911       | BIC-Seq2       | 0.7016           | 0.6984         | Wabico           | 0.7431       | 0.7419     | Wabico       |
| 1634-01A | 909            | 0.9404         | 0.9446       | BIC-Seq2       | 0.9485           | 0.9514         | BIC-Seq2         | 0.9444       | 0.9480     | BIC-Seq2     |
| 1666-01A | 944            | 0.9860         | 0.9860       | Wabico         | 0.5441           | 0.5419         | Wabico           | 0.7012       | 0.6994     | Wabico       |
| 2000-01A | 1489           | 0.9694         | 0.9716       | BIC-Seq2       | 0.9728           | 0.9693         | Wabico           | 0.9711       | 0.9704     | Wabico       |
| 2024-01A | 882            | 1.0000         | 1.0000       | SAME           | 0.4846           | 0.4732         | Wabico           | 0.6528       | 0.6424     | Wabico       |
| 2045-01A | 1229           | 0.9579         | 0.9562       | Wabico         | 0.9838           | 0.9838         | SAME             | 0.9707       | 0.9698     | Wabico       |
| 2050-01A | 1293           | 0.9923         | 0.9935       | BIC-Seq2       | 0.6090           | 0.6043         | Wabico           | 0.7548       | 0.7515     | Wabico       |
| 2290-01A | 1013           | 0.9103         | 0.9222       | BIC-Seq2       | 0.6166           | 0.6287         | BIC-Seq2         | 0.7352       | 0.7477     | BIC-Seq2     |
| 2391-01A | 1028           | 0.9598         | 0.9572       | Wabico         | 0.5196           | 0.5109         | Wabico           | 0.6742       | 0.6662     | Wabico       |
| 2400-01A | 1098           | 0.9260         | 0.9270       | BIC-Seq2       | 0.9249           | 0.9237         | Wabico           | 0.9255       | 0.9254     | Wabico       |

**Table S10.** A comparison on precision, recall, and F1-scores of segments from Wabico and BIC-Seq2 among TCGA patients with OVC

## 2.9 Correlation with TCGA level3 segments (2)

Additionally, we compared the performance of Wabico and the performance of the GC correction method used in the CNVkit method. Although CNVkit is mainly focused on the detection of CN variations in WES data, it also supports functions for WGS data processing. We applied the following command to the WGS tumor bam files. “cnvkit.py batch TUMORBAM -r REFERENCE”, where TUMORBAM is the location of the WGS bam file and REFERENCE is the location of human reference sequence of hg19. It produces a cnr file. We denote the GC bias corrected copy number ratio signal in the cnr file as  $CN_{CNVKIT}$ . This signal consists of 536,913 markers for 22 somatic chromosomes. We call the markers  $MARKER_{CNVKIT}$ . The median of genomic ranges of  $MARKER_{CNVKIT}$  is 5,000 bps. In the previous section, we used 22,641,222 markers that cover 100 uniquely mappable positions for the comparison of  $CN_{Wabico}$  and  $CN_{BIC-Seq2}$ . We call these markers  $MARKER_{WABICO}$ . The median of genomic ranges of  $MARKER_{WABICO}$  is 100 bps. To compare the GC correction result of Wabico to that of  $CN_{CNVKIT}$ , we created  $CN'_{Wabico}$  from  $CN_{Wabico}$ .  $CN'_{Wabico}$  consists of 536,913 markers whose genomic ranges are identical to  $MARKER_{CNVKIT}$ . We first calculated the overlaps of genomic ranges between  $MARKER_{WABICO}$  and  $MARKER_{CNVKIT}$ . Then, we calculated copy number ratios of markers in  $MARKER_{CNVKIT}$  by averaging the copy number ratios of  $MARKER_{WABICO}$  whose genomic ranges are within the marker. After converting  $MARKER_{WABICO}$  to  $MARKER_{CNVKIT}$ , we calculated the correlation coefficient between denoised  $CN'_{Wabico}$  signal and TCGA level 3 segments. We also calculated the correlation coefficient between denoised  $CN_{CNVKIT}$  signal and TCGA level 3 segments. Finally, we compared the correlation coefficients from Wabico and CNVkit. Tables S11, S12, and S13 show comparison of correlation coefficients for GBM, LUAD, and OVC datasets. Except for one OV sample (0934-01A), correlation coefficients of Wabico are higher than those of CNVkit for all three tumor datasets. Figure S8 shows an example of the denoised copy number ratios of chromosome 1 (GBM 0745-01A). Note that because paired normal control was not used in Wabico, it was not used in CNVkit as well.

| TCGA-ID  | The number of markers | Correlation Wabico | Correlation CNVkit (cnr file) | Higher Correlation |
|----------|-----------------------|--------------------|-------------------------------|--------------------|
| 0125-01A | 535777                | 0.87848            | 0.72906                       | Wabico             |
| 0145-01A | 535371                | 0.84404            | 0.55203                       | Wabico             |
| 0152-01A | 535506                | 0.80275            | 0.54914                       | Wabico             |
| 0157-01A | 535253                | 0.85851            | 0.5659                        | Wabico             |
| 0171-01A | 535250                | 0.87298            | 0.68017                       | Wabico             |
| 0185-01A | 535432                | 0.85779            | 0.65482                       | Wabico             |
| 0190-01A | 535348                | 0.79844            | 0.50577                       | Wabico             |
| 0210-01A | 535617                | 0.81826            | 0.40524                       | Wabico             |
| 0211-01A | 535148                | 0.83815            | 0.56893                       | Wabico             |
| 0214-01A | 535233                | 0.85735            | 0.65871                       | Wabico             |
| 0648-01A | 535271                | 0.88541            | 0.63432                       | Wabico             |
| 0686-01A | 534896                | 0.87435            | 0.5907                        | Wabico             |
| 0744-01A | 535105                | 0.9109             | 0.5281                        | Wabico             |
| 0745-01A | 535724                | 0.92286            | 0.58066                       | Wabico             |
| 1034-01A | 535340                | 0.90172            | 0.70563                       | Wabico             |
| 1389-01A | 535861                | 0.68329            | 0.42393                       | Wabico             |
| 1402-01A | 535457                | 0.84944            | 0.74271                       | Wabico             |
| 1444-01A | 535268                | 0.77853            | 0.27538                       | Wabico             |
| 1823-01A | 535287                | 0.89335            | 0.54405                       | Wabico             |
| 1831-01A | 535455                | 0.88079            | 0.65506                       | Wabico             |
| 1970-01A | 535583                | 0.91541            | 0.71024                       | Wabico             |
| 2483-01A | 534982                | 0.91899            | 0.52436                       | Wabico             |
| 2485-01A | 535328                | 0.91614            | 0.81064                       | Wabico             |
| 2523-01A | 535423                | 0.89347            | 0.71995                       | Wabico             |
| 2528-01A | 534975                | 0.78696            | 0.50016                       | Wabico             |
| 2554-01A | 535276                | 0.86637            | 0.66133                       | Wabico             |
| 2557-01A | 535404                | 0.87807            | 0.53493                       | Wabico             |
| 2570-01A | 535297                | 0.69657            | 0.52162                       | Wabico             |
| 2620-01A | 535405                | 0.80463            | 0.3678                        | Wabico             |
| 2624-01A | 535496                | 0.78823            | 0.53824                       | Wabico             |
| 2629-01A | 535131                | 0.92174            | 0.61723                       | Wabico             |
| 5132-01A | 535156                | 0.9104             | 0.44811                       | Wabico             |
| 5135-01A | 535396                | 0.88525            | 0.75889                       | Wabico             |
| 5411-01A | 535398                | 0.81256            | 0.64685                       | Wabico             |
| 5415-01A | 535789                | 0.8991             | 0.75758                       | Wabico             |
| 5651-01A | 535390                | 0.8919             | 0.76852                       | Wabico             |
| 5960-01A | 535478                | 0.8917             | 0.60256                       | Wabico             |

**Table S11.** Performance comparison between denosing results of Wabico and the CNVkit bias correction method for TCGA GBM data.

| TCGA-ID  | The number of markers | Correlation Wabico | Correlation CNVkit (cnr file) | Higher Correlation |
|----------|-----------------------|--------------------|-------------------------------|--------------------|
| 1678-01A | 535436                | 0.91748            | 0.76154                       | Wabico             |
| 1680-01A | 535263                | 0.87701            | 0.27079                       | Wabico             |
| 2659-01A | 535006                | 0.94504            | 0.72945                       | Wabico             |
| 4389-01A | 535387                | 0.89948            | 0.73512                       | Wabico             |
| 4395-01A | 535027                | 0.94717            | 0.80927                       | Wabico             |
| 4396-01A | 535217                | 0.91294            | 0.76112                       | Wabico             |
| 4397-01A | 535376                | 0.94253            | 0.72946                       | Wabico             |
| 4398-01A | 535074                | 0.91699            | 0.48248                       | Wabico             |
| 4420-01A | 535371                | 0.93229            | 0.52854                       | Wabico             |
| 4422-01A | 535331                | 0.91693            | 0.51375                       | Wabico             |
| 4432-01A | 535199                | 0.90999            | 0.62904                       | Wabico             |
| 5066-01A | 534931                | 0.65904            | 0.4766                        | Wabico             |
| 5147-01A | 535129                | 0.9329             | 0.82013                       | Wabico             |
| 5429-01A | 535914                | 0.78766            | 0.54683                       | Wabico             |
| 6148-01A | 535334                | 0.53176            | 0.28568                       | Wabico             |
| 6203-01A | 535216                | 0.59415            | 0.22676                       | Wabico             |
| 6215-01A | 535432                | 0.89207            | 0.79872                       | Wabico             |
| 6597-01A | 535471                | 0.91748            | 0.84928                       | Wabico             |
| 6840-01A | 535378                | 0.94359            | 0.90599                       | Wabico             |
| 7030-01A | 535325                | 0.22566            | 0.10859                       | Wabico             |
| 7143-01A | 535467                | 0.9018             | 0.7823                        | Wabico             |
| 7146-01A | 535474                | 0.92389            | 0.82847                       | Wabico             |
| 7156-01A | 535326                | 0.87017            | 0.80056                       | Wabico             |
| 7158-01A | 535428                | 0.93116            | 0.85631                       | Wabico             |
| 7281-01A | 535311                | 0.83593            | 0.49722                       | Wabico             |
| 7535-01A | 535385                | 0.93099            | 0.65685                       | Wabico             |
| 8171-01A | 535314                | 0.92857            | 0.75315                       | Wabico             |
| 8299-01A | 535345                | 0.28905            | 0.26113                       | Wabico             |

**Table S12.** Performance comparison between denosing results of Wabico and the CNVkit bias correction method for TCGA LUAD cancer.

| TCGA-ID  | The number of markers | Correlation Wabico | Correlation CNVkit (cnr file) | Higher Correlation |
|----------|-----------------------|--------------------|-------------------------------|--------------------|
| 0723-01A | 535311                | 0.8685             | 0.82092                       | Wabico             |
| 0727-01A | 535303                | 0.96381            | 0.88269                       | Wabico             |
| 0751-01A | 535023                | 0.95437            | 0.75566                       | Wabico             |
| 0890-01A | 534848                | 0.94458            | 0.63089                       | Wabico             |
| 0906-01A | 534889                | 0.96859            | 0.77125                       | Wabico             |
| 0912-01A | 535703                | 0.94346            | 0.75702                       | Wabico             |
| 0934-01A | 535139                | 0.90535            | 0.9191                        | CNVkit             |
| 0937-01A | 535156                | 0.96038            | 0.90836                       | Wabico             |
| 0938-01A | 535888                | 0.94128            | 0.89863                       | Wabico             |
| 0980-01A | 535092                | 0.93491            | 0.80239                       | Wabico             |
| 0982-01A | 535222                | 0.82582            | 0.82582                       | Wabico             |
| 1103-01A | 535014                | 0.83316            | 0.7563                        | Wabico             |
| 1110-01A | 535200                | 0.95996            | 0.86785                       | Wabico             |
| 1118-01A | 535340                | 0.92693            | 0.82188                       | Wabico             |
| 1124-01A | 534856                | 0.95779            | 0.8929                        | Wabico             |
| 1331-01A | 535238                | 0.90827            | 0.75609                       | Wabico             |
| 1347-01A | 535109                | 0.94368            | 0.82881                       | Wabico             |
| 1349-01A | 534795                | 0.95574            | 0.85959                       | Wabico             |
| 1367-01A | 534781                | 0.93368            | 0.72583                       | Wabico             |
| 1411-01A | 535047                | 0.90668            | 0.77213                       | Wabico             |
| 1419-01A | 535293                | 0.88039            | 0.7863                        | Wabico             |
| 1466-01A | 535455                | 0.92799            | 0.78341                       | Wabico             |
| 1477-01A | 535203                | 0.90315            | 0.73165                       | Wabico             |
| 1487-01A | 534975                | 0.93157            | 0.76821                       | Wabico             |
| 1491-01A | 535233                | 0.94436            | 0.62768                       | Wabico             |
| 1514-01A | 535310                | 0.89836            | 0.83848                       | Wabico             |
| 1542-01A | 535123                | 0.96828            | 0.80482                       | Wabico             |
| 1544-01A | 535340                | 0.94092            | 0.79784                       | Wabico             |
| 1548-01A | 535405                | 0.95661            | 0.82027                       | Wabico             |
| 1552-01A | 535204                | 0.91993            | 0.78024                       | Wabico             |
| 1557-01A | 535402                | 0.96169            | 0.91814                       | Wabico             |
| 1558-01A | 535389                | 0.90476            | 0.85474                       | Wabico             |
| 1562-01A | 535208                | 0.9433             | 0.75905                       | Wabico             |
| 1570-01A | 535234                | 0.90889            | 0.90084                       | Wabico             |
| 1571-01A | 535261                | 0.91429            | 0.87236                       | Wabico             |
| 1574-01A | 535252                | 0.9586             | 0.81514                       | Wabico             |
| 1614-01A | 535287                | 0.96064            | 0.82556                       | Wabico             |
| 1632-01A | 535111                | 0.93261            | 0.74177                       | Wabico             |
| 1634-01A | 535065                | 0.94719            | 0.66543                       | Wabico             |
| 1666-01A | 535105                | 0.94086            | 0.79522                       | Wabico             |
| 2000-01A | 535403                | 0.92733            | 0.91057                       | Wabico             |
| 2024-01A | 535045                | 0.93471            | 0.73247                       | Wabico             |
| 2045-01A | 535288                | 0.92253            | 0.74565                       | Wabico             |
| 2050-01A | 535122                | 0.94872            | 0.71532                       | Wabico             |
| 2290-01A | 534889                | 0.94096            | 0.81036                       | Wabico             |
| 2391-01A | 535070                | 0.94336            | 0.88571                       | Wabico             |
| 2400-01A | 535356                | 0.91264            | 0.86581                       | Wabico             |

**Table S13.** Performance comparison between denosing results of Wabico and the CNVkit bias correction method for TCGA OVC data.

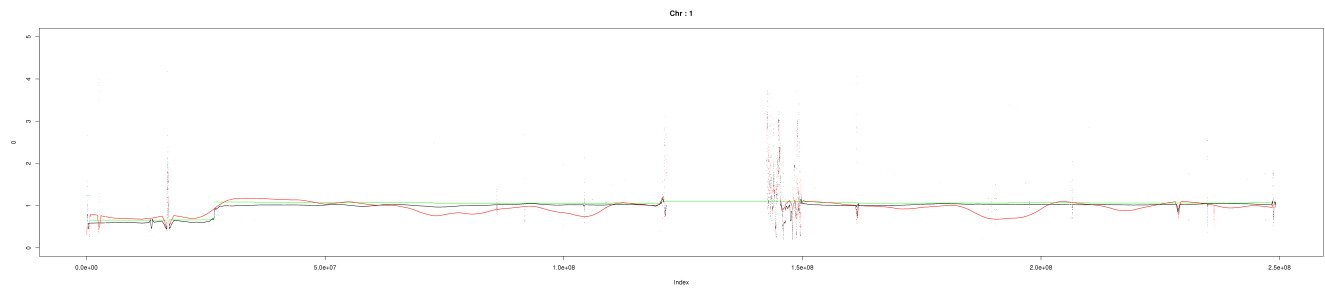

**Figure S8.** Copy number (CN) Ratio signals of chromosome 1 in TCGA GBM 0745-01A samples. Green lines, red lines, and black lines show TCGA level 3 segments,  $CN_{CNKIT}$  signal, and  $CN_{Wabico}$  signal, respectively.



## References

1. Jang, H., Hur, Y. & Lee, H. Identification of cancer-driver genes in focal genomic alterations from whole genome sequencing data. Scientific reports **6** (2016).
